# Supplementary material
Source: bioRxiv or medRxiv preprint supplement (https://www.biorxiv.org/highwire/filestream/67308/field_highwire_adjunct_files/0/220723-1.pdf)
Supplement: Supplementary file [file 220723-1.pdf]

## Supplemental Material

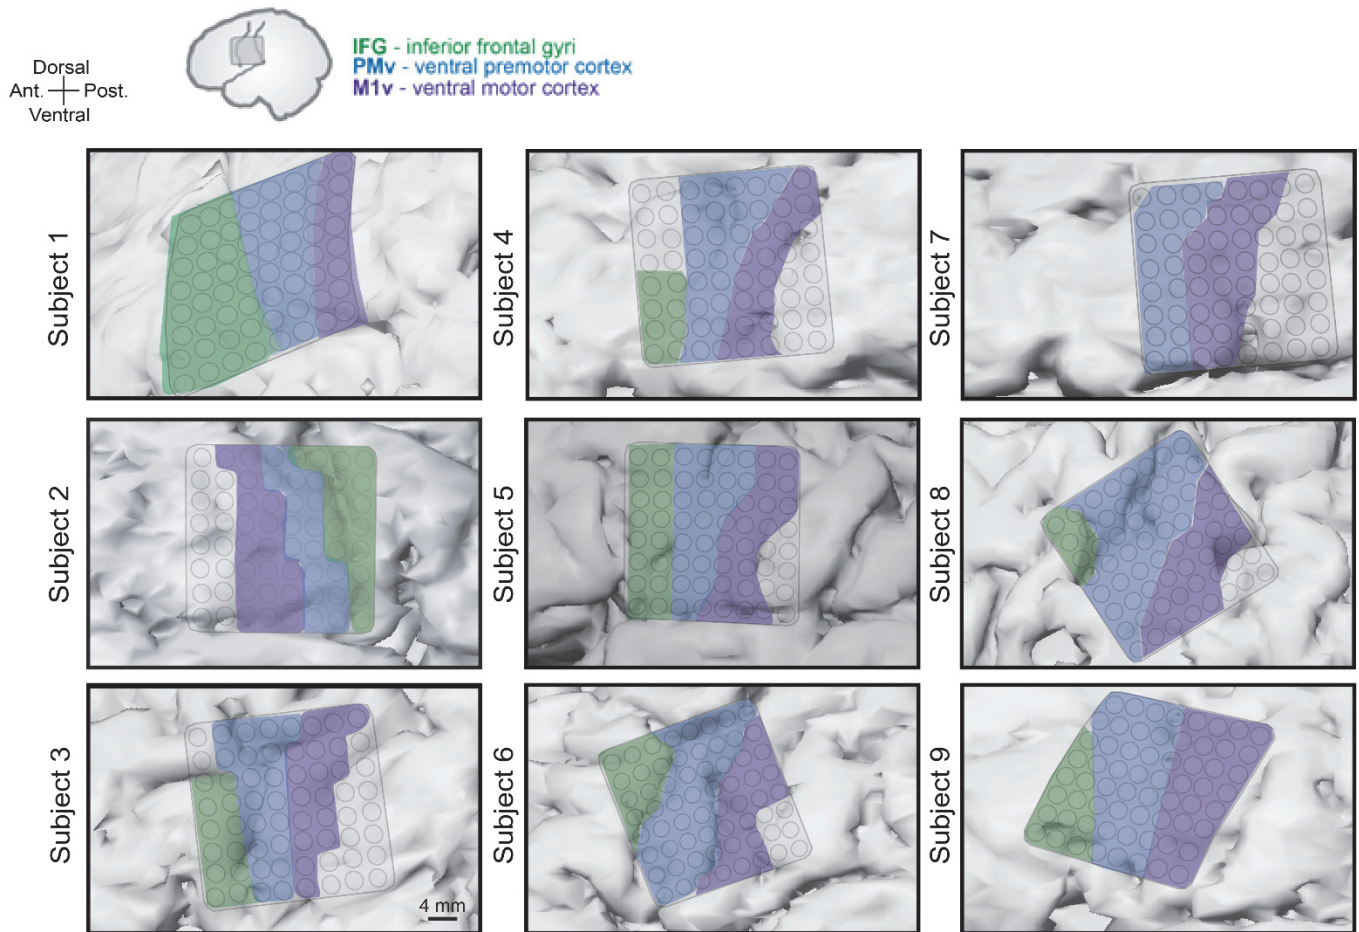

**Figure S1.** Electrode array locations for all 9 subjects. Shaded areas represent the different cortical areas: IFG (green), PMv (blue), and M1v (purple). Note that Subject 2 was implanted in the right hemisphere and so anterior-posterior direction is reversed.
